# Supplementary material for: Glycogen branching enzyme controls cellular iron homeostasis via Iron Regulatory Protein 1 and mitoNEET
Source: PubMed Central journal article supplement (PMC6884552; doi:10.1038/s41467-019-13237-8), 2019-11-29
Supplement: 41467_2019_13237_MOESM3_ESM.pdf [file 41467_2019_13237_MOESM3_ESM.pdf]

### **Description of Additional Supplementary Files**

File Name: Supplementary Data 1

Description: Mass spectrometry results for ring gland and whole body samples.

File Name: Supplementary Data 2

Description: Gene ontology analysis of mass spectrometry results.

File Name: Supplementary Data 3

Description: RNA-Seq data listing 234 genes downregulated by transgenic expression of IRP1A variants.

File Name: Supplementary Data 4

Description: Gene ontology analysis of 234 downregulated genes obtained from RNASeq results.
